# Supplementary material
Source: HighWire-hosted journal article supplement (http://www.cmajopen.ca/highwire/filestream/80851/field_highwire_adjunct_files/1/open-2015-0135-original-submission.pdf)
Supplement: open-2015-0135-original-submission.pdf [file open-2015-0135-original-submission.pdf]

# Patterns of Skin Disease in a Canadian Prison Population: a Retrospective Study

Geneviève Gavigan<sup>1,2</sup>, Alana McEvoy<sup>1,2</sup>, James Walker<sup>1,2</sup>

<sup>1</sup>University of Ottawa, Division of Dermatology, Department of Medicine, Ottawa, Canada

<sup>2</sup>Ottawa Hospital Research Institute, Division of Dermatology, Department of Medicine, Ottawa, Canada

## Authors:

Geneviève Gavigan, MASC, MD

Alana McEvoy, MD

James Douglas Walker, MD

## Corresponding author for communications from Editorial Office and galley proofs:

Geneviève Gavigan: [genevieve.gavigan@gmail.com](mailto:genevieve.gavigan@gmail.com)

Civic Parkdale Clinic

Division of Dermatology

Main Floor East Room 10

737 Parkdale Avenue; Ottawa ON K1Y 4E9

Phone: (613) 761-4774

## Corresponding author for reprint requests:

James Walker: [jawalker@toh.on.ca](mailto:jawalker@toh.on.ca)

The Ottawa Hospital Civic Campus

Civic Parkdale Clinic

Room 10 Ground East

737 Parkdale Avenue; Ottawa ON K1Y 1J8

Phone: (613) 761-4774; Fax: (613) 761-5093

Abstract Word Count: 243

Text Word Count: 1916

References: 11

Tables: 5

Figures: 0

IRB Approval: Ethics approval was obtained from both the Ottawa Hospital Research Ethics Board and Correctional Service Canada. Documentation for each is provided.

Conflicts of Interest: This study was not funded. JW was contracted by CSC during the study time frame as a consultant dermatologist. GG and AM have no conflicts of interest to declare.

Acknowledgments: The authors would like to thank Dr. Tim Ramsay for assisting with the methodology of this study, and Dr. Jeff Turnbull for reviewing the manuscript.

1  
2  
3  
4  
5  
6  
7  
8  
9  
10  
11  
12  
13  
14  
15  
16  
17  
18  
19  
20  
21  
22  
23  
24  
25  
26  
27  
28  
29  
30  
31  
32  
33  
34  
35  
36  
37  
38  
39  
40  
41  
42  
43  
44  
45  
46  
47  
48  
49  
50  
51  
52  
53  
54  
55  
56  
57  
58  
59  
60

Confidential

## 1 **Abstract**

### 2 **Background**

3  
4  
5  
6  
7  
8  
9  
10  
11  
12  
13  
14  
15  
16  
17  
18  
19  
20  
21  
22  
23  
24  
25  
26  
27  
28  
29  
30  
31  
32  
33  
34  
35  
36  
37  
38  
39  
40  
41  
42  
43  
44  
45  
46  
47  
48  
49  
50  
51  
52  
53  
54  
55  
56  
57  
58  
59  
60

4 Dermatology in incarcerated citizens is under-researched. To the best of our knowledge, there are no  
5 studies examining skin diseases in prisoners in Canada. Our objectives were: 1) to analyse the most  
6 common referred skin diseases affecting the inmates of Correctional Service Canada in Ontario,  
7 Canada, 2) to assess the value of teledermatology in this setting, and 3) to recommend potential system  
8 improvements.

### 10 **Methods**

11 An observational, cross-sectional, retrospective chart review of inmate patients seen from 2008 until  
12 2013 was performed. Two groups of patients were analyzed: those assessed in-person, and those  
13 evaluated by store-forward teledermatology.

### 15 **Results**

16 In the in-person patient group, the 3 most common diagnoses were acne vulgaris, psoriasis, and  
17 seborrheic dermatitis. For the teledermatology group, the 3 most frequent diagnoses were acne  
18 vulgaris, psoriasis, and dermatophyte infection. There was a clear bias towards more inmates being  
19 seen in-person where the service was provided (Collins Bay Institution) than from other correctional  
20 institutions in Eastern Ontario.

### 22 **Interpretation**

23 The majority of skin diseases that affected the incarcerated population studied were common  
24 afflictions, similar to the general population, which is in agreement with other studies. There is an  
25 opportunity to provide improved dermatologic care for this patient population by further utilizing

1  
2  
3  
4  
5  
6  
7  
8  
9  
10  
11  
12  
13  
14  
15  
16  
17  
18  
19  
20  
21  
22  
23  
24  
25  
26  
27  
28  
29  
30  
31  
32  
33  
34  
35  
36  
37  
38  
39  
40  
41  
42  
43  
44  
45  
46  
47  
48  
49  
50  
51  
52  
53  
54  
55  
56  
57  
58  
59  
60

26 teledermatology and by having a dermatologist visit various institutions to reduce inmate transport.  
27 Limitations of this study include that the study population was restricted to adult male inmates of  
28 Correctional Service Canada in Ontario, Canada, who were referred to dermatology by a prison  
29 physician.

31 **Keywords**

- 32 • Vulnerable population
- 33 • Prison
- 34 • Correctional Service Canada
- 35 • Dermatology

Confidential

## 37 **Introduction**

38 Dermatology in vulnerable populations is under-researched. When focusing on the incarcerated  
39 population, there are few studies that have described skin disease in prisoners. To the best of our  
40 knowledge, only one of these studies was from North America, and none examined the Canadian  
41 inmate population.

42  
43 In 2008, Bayle et al. studied the prison population in Toulouse, France. Of the 178 men who were seen  
44 in a 12-week period, they found the 5 most frequent diagnoses to be disorders of the pilosebaceous  
45 follicle, fungal diseases, benign skin tumors, warts, and eczemas. They also evaluated the impact of the  
46 skin disease on the prisoner's life, and found that most (72%) felt that their skin disease was related to  
47 their detention. [1]

48  
49 Oninla et al. reported specifically on skin infections and infestations in prison inmates in Nigeria.

50 Almost half of all inmates acquired infectious dermatoses, including dermatophytes (64%), pityriasis  
51 versicolour (27%), bacterial infections (3. 4%), and others (5. 6%). [2] A second study analyzing the  
52 same inmate population found a significant relationship between overcrowding and the development of  
53 skin infections, suggesting that prison conditions likely facilitate the pattern of dermatoses. [3]

54  
55 Coury and Kelly reviewed the skin conditions seen in a dermatology referral clinic for inmates in the  
56 Texas Department of Criminal Justice System. The three most common diagnoses in this outpatient  
57 prison population included (in descending order): psoriasis, actinic keratosis, and hair diseases. [4]

58  
59 More recently, there have been two studies that have analyzed the dermatologic skin conditions found  
60 in male and female inmate populations, respectively. A cross-sectional study on dermatological

1  
2  
3  
4  
5  
6  
7  
8  
9  
10  
11  
12  
13  
14  
15  
16  
17  
18  
19  
20  
21  
22  
23  
24  
25  
26  
27  
28  
29  
30  
31  
32  
33  
34  
35  
36  
37  
38  
39  
40  
41  
42  
43  
44  
45  
46  
47  
48  
49  
50  
51  
52  
53  
54  
55  
56  
57  
58  
59  
60

61 diseases among male prisoners in Italy, found the most common diseases were nonspecific dermatitis,  
62 acne, mycosis, and scabies. [5] Furthermore, associations of skin diseases with substance addiction  
63 status and age were identified, as well as an association between the length of detention and the rate of  
64 dermatological disease. [5]

66 Kocaturk et al. analyzed the prevalence of skin diseases and the psychological impact of these  
67 conditions on female prisoners in Turkey. Over a 6-week period, acne was the most prevalent condition  
68 (34%), followed by hair loss (19%), dry skin (16%), and eczema (12%). They concluded that prisoners  
69 might have common skin conditions similar to the general population. [6]

71 To the best of our knowledge, there are currently no published studies that have examined the  
72 prevalence of skin disease in the Canadian incarcerated population. The objective of this study was to  
73 investigate the most common skin diseases affecting male inmates in Correctional Service Canada  
74 institutions in Eastern Ontario, Canada.

## 76 **Methods**

77  
78 Ethics approval was obtained from both the Ottawa Hospital Research Ethics Board and Correctional  
79 Service Canada. Starting in May 2008, six dermatology clinics per year were conducted only at Collins  
80 Bay Institution (CBI) (Kingston, Ontario, Canada). Consultation requests were placed by referring  
81 prison physicians. Patients were escorted and transported to and seen at Collins Bay Institution from  
82 any of the following Eastern Ontario institutions to attend their dermatology appointment: the former  
83 Kingston Penitentiary, Bath Institution, Millhaven Institution, Pittsburgh Institution, Frontenac  
84 Institution, Regional Treatment Centre, and Joyceville Institution. Inmates at CBI were escorted to  
85 their appointments, but there was no transport of prisoners beyond the prison confines. Table 1  
86 summarizes the facility characteristics of the institutions involved; the capacities listed approximate  
87 those at the time of consultation. [7,8]

88  
89 An additional subset of patients was seen in store forward teledermatology from the non-CBI  
90 institutions plus the more distant Warkworth Institution (Ontario, Canada). In store forward  
91 teledermatology, the dermatologist examines clinical photographs of patients that accompany a history  
92 provided by the referring physician, which are sent over a secure internet connection. The  
93 dermatologist then provides written descriptions, and diagnostic and therapeutic instructions to the  
94 referring physician. There is no direct interaction between the dermatologist and the patient and there  
95 is no transport of prisoners outside of their host institutions.

96  
97 In Canada, essential physician services are paid for by governments (federal inmates are insured by the  
98 federal government), therefore patients evaluated in both in-person consultation and by  
99 teledermatology had access to care, free of charge. The study patient population was limited to males

1  
2  
3 100 18 years of age or older, with a sentence of two years or longer, as the correctional facilities included in  
4  
5 101 this study exclusively housed this demographic. It is noteworthy that all patients were evaluated by a  
6  
7 102 single dermatologist, and no other dermatology consultation service was provided to this population  
8  
9  
10 103 over this timeframe.

11  
12 104  
13  
14 105 The charts of all patients who had an in-person dermatology or teledermatology assessment while they  
15  
16  
17 106 were inmates at a federal correctional facility between May 1, 2008 and June 30, 2013 were reviewed  
18  
19 107 for this observational, cross-sectional study. For every patient, each new diagnosis was recorded. As  
20  
21 108 there may be less certainty in diagnoses made through teledermatology, the in-person and the  
22  
23  
24 109 teledermatology groups were analyzed separately in order to determine the most frequent dermatologic  
25  
26 110 conditions. When a patient was evaluated in both in-person consultation and via teledermatology for  
27  
28  
29 111 the same diagnosis, the diagnosis was only recorded for the first encounter (either in-person or  
30  
31 112 teledermatology). However, when a patient was evaluated in both in-person consultation and via  
32  
33 113 teledermatology for different diagnoses, each of these diagnoses was recorded separately (depending  
34  
35  
36 114 on where each diagnosis was made).

37  
38 115  
39  
40 116 To assess the most frequent dermatologic conditions, similar diagnoses were grouped together (Table  
41  
42  
43 117 2). In addition, the five most common specific diagnoses were reported.

## 44 45 118 46 47 119 **Results**

48 120  
49 121 A total of 320 patients were assessed. Table 3 summarizes demographic data on the patient population.  
50  
51  
52 122 258 patients were seen exclusively in-person, 60 were evaluated exclusively through teledermatology,  
53  
54 123 and 2 patients were assessed in both settings with different diagnoses made in each type of encounter.  
55  
56  
57 124 Each patient received an average of 1.5 dermatologic diagnoses (range 0-6), and were seen an average  
58  
59 125 of 1.5 times (range 1-16) times.  
60



1  
2  
3 126  
4  
5 127 In the in-person patient group, a total of 401 dermatologic diagnoses were provided, whereas 85  
6  
7 128 diagnoses were given to teledermatology patients. In the in-person patient population, the 3 most  
8  
9  
10 129 frequent diagnostic groupings were dermatitis (73), acneiform eruptions (68), and benign neoplasms  
11  
12 130 and hyperplasias (52), whereas in the teledermatology population acneiform eruptions (17), dermatitis  
13  
14 131 (15), and infections (8) were the three most commonly encountered groupings. Table 4 outlines the  
15  
16  
17 132 frequency of the grouped dermatologic diagnoses.

18  
19 133  
20  
21 134 With respect to the specific dermatologic diagnoses, acne vulgaris (61), psoriasis (45), and seborrheic  
22  
23  
24 135 dermatitis (19) were the top three diagnoses in the in-person population. Acne vulgaris (12), psoriasis  
25  
26 136 (6), and dermatophyte infection (5) were the three most common specific diagnoses in the  
27  
28  
29 137 teledermatology population. This data is summarized in Table 5.

30  
31 138  
32  
33 139 Of the 258 in-person new encounters, 117 (45.3%) of these were performed at CBI, yet this institution  
34  
35  
36 140 where the dermatology service was provided, housed only 225 of the 2965 (7.6%) inmates in Eastern  
37  
38 141 Ontario federal prisons.

## 42 143 **Interpretation**

43 144  
44 145 Previous studies have found that prisoners are mostly afflicted by common skin diseases and skin  
45  
46  
47 146 infections. [1-6] Our results support these conclusions. When comparing our grouped dermatologic  
48  
49 147 diagnoses, others have also found that dermatitis [1,5,6,10], acneiform eruptions [1,3,5,6,10], benign  
50  
51  
52 148 neoplasms and hyperplasias [1], and infections [1,2,3,5,10], were among the most frequently diagnosed  
53  
54 149 dermatologic diseases. The most common specific diagnoses including: acne vulgaris [1,3,5,6,10],  
55  
56 150 psoriasis [1,4], seborrheic dermatitis [1,3], and dermatophyte infection [1,2,3,5], were also comparable  
57  
58  
59 151 to previous reports.  
60

1  
2  
3  
4  
5  
6  
7  
8  
9  
10  
11  
12  
13  
14  
15  
16  
17  
18  
19  
20  
21  
22  
23  
24  
25  
26  
27  
28  
29  
30  
31  
32  
33  
34  
35  
36  
37  
38  
39  
40  
41  
42  
43  
44  
45  
46  
47  
48  
49  
50  
51  
52  
53  
54  
55  
56  
57  
58  
59  
60

152

Although the most frequent dermatologic diagnoses in the in-person population and the teledermatology population were analyzed separately, the results of the two groups were comparable. Specifically, for the grouped diagnoses; dermatitis, acneiform eruptions, and benign neoplasms and hyperplasias, were the 3 most frequently seen in the in-person group, whereas acneiform eruptions, dermatitis, and infections were the 3 most frequent in the teledermatology group. However, if this is extended to the 4 most frequent diagnoses, they are identical. An explanation why more benign neoplasms and hyperplasias were diagnosed in the in-person group versus the teledermatology group might have been because the referring physician was concerned about possible malignancy in a lesion and preferred to have it assessed in-person. With respect to the specific diagnoses, psoriasis and seborrheic dermatitis were the 2 most frequent diagnoses in both groups.

163

Although these diagnoses are common in the non-incarcerated population, some factors in the prison environment may contribute. Bayle et al. suggested that stress in the prison environment and smoking may contribute to the high frequency of disorders of the pilosebaceous unit. [1] The smoking habits of our study population were not assessed. In addition, age, substance addiction, and length of detention have been associated with dermatologic disease. [5] Finally, some studies have suggested that personal hygiene and overcrowding may play a role. [2,3,5,10] Brauner and Goodheart highlighted some of the potential difficulties executing dermatologic treatments in prisoners, including limitations to the dosing frequency of pills and the dispensing of topical compounds, or the use of harsh soaps and skin care products. [10] Furthermore, in the Eastern Ontario correctional facilities, there is a limited formulary of available products.

174

1  
2  
3 175 Collins Bay Institution, where all of the in-person dermatologic assessments were performed, housed  
4  
5 176 7.6% (225/2965) of prisoners in Eastern Ontario federal institutions (see Table I), but 45.3% (117/258)  
6  
7 177 of the in-person encounters occurred at CBI. (see Table III). This may indicate a referral bias. Because  
8  
9  
10 178 of concerns with inmate transport and security and complexities of communication between  
11  
12 179 institutions, it may be that the “in-house” inmates at CBI inadvertently received increased dermatologic  
13  
14 180 care and that inmates in other institutions were relatively underserved.  
15  
16

17 181  
18  
19 182 The concept that teledermatology is an effective tool to provide care to vulnerable populations is not  
20  
21 183 novel. [9] Coates et al. reviewed the accuracy and reliability of teledermatology, and suggested that  
22  
23 184 outcomes were comparable to live encounters. [11] This study supports the use of teledermatology to  
24  
25 185 manage skin disease in prisoners. Teledermatology could be a cost savings means of providing health  
26  
27  
28 186 care. For example, prisoners not housed at Collins Bay Institution were required to travel with escorts  
29  
30  
31 187 to CBI for in-person dermatology appointments. There are also safety concerns with transporting  
32  
33 188 prisoners outside of the institutions. The most common dermatologic conditions treated in our study  
34  
35 189 would likely be amenable to teledermatology, thereby decreasing costs and increasing security.  
36  
37

38 190  
39  
40 191 There are several limitations to this study. While, to our best knowledge, this is the first attempt to  
41  
42 192 characterize the dermatologic disease seen in the incarcerated population in Canada, the population  
43  
44  
45 193 examined is strictly adult males in Ontario facilities. A broader study examining both males and  
46  
47 194 females across Canada might provide more generalizable data. In addition, the majority of patients  
48  
49  
50 195 included were from Collins Bay Institution, which may have skewed the results towards one population  
51  
52 196 of inmates. Furthermore, only inmates referred for dermatologic consultation were included, therefore  
53  
54 197 the sample was not randomized and the incidence or prevalence of dermatologic disease in the  
55  
56 198 incarcerated population cannot be calculated. In addition, any skin diseases treated successfully by  
57  
58  
59  
60

1  
2  
3  
4  
5  
6  
7  
8  
9  
10  
11  
12  
13  
14  
15  
16  
17  
18  
19  
20  
21  
22  
23  
24  
25  
26  
27  
28  
29  
30  
31  
32  
33  
34  
35  
36  
37  
38  
39  
40  
41  
42  
43  
44  
45  
46  
47  
48  
49  
50  
51  
52  
53  
54  
55  
56  
57  
58  
59  
60

199 other physicians, such the prison physician, would not have been included. Likely this would bias our  
200 studies' results to capture more complex or treatment resistant skin diseases.

201

202 In conclusion, the skin diseases that affected the federally incarcerated population in Ontario, Canada  
203 were in general common skin diseases, which is in agreement with other studies. Teledermatology  
204 provides a useful means of delivering dermatologic care to this vulnerable population, and it's use  
205 could be expanded. Thirdly, it could be of value to move the dermatologist to various correctional  
206 institutions, rather than moving the inmates, in order to provide higher quality and safer service at a  
207 lower cost.

Confidential

## References

1. Bayle P, Cuzin L, Paul C, Blanc A, Rouge D, Telmon N. Prisoners and skin diseases in Toulouse, France: Epidemiological analysis and evaluation of life impact. *J Eur Acad Dermatol Venereol.* 2009;23;52-57.
2. Oninla OA, Onayemi O. Report: Skin infections and infestations in prison inmates. *Int J Dermatol.* 2012;51;178-181.
3. Oninla OA, Onayemi O, Olasode OA, Oninla SO. Pattern of dermatoses among inmates of Ilesha prison Nigeria. *Niger Postgrad Med J.* 2013;20(3):174-80.
4. Coury C, Kelly B. Prison dermatology: Experience in the Texas Department of Criminal Justice dermatology clinic. *J Correct Health Care.* 2012;18(4);302-308.
5. Mannocci A, Di Thiene D, Semyonov L, Boccia A, La Torre G. A cross-sectional study on dermatological diseases among male prisoners in southern Lazio, Italy. *Int J Dermatol.* 2014;53(5):586-92.
6. Kocaturk E, Kocaturk A, Kayala M. Prevalence of skin diseases in female prisoners in Turkey: analysis of impact of prison conditions and psychological stress. *Acta Dermatovenerol Croat.* 2014;22(1):26-31.
7. Parole Board of Canada. Photographs of Federal Penitentiaries. Available at: [http://pbc-clcc.gc.ca/victims/photos/Ontario/kingston\\_1-eng\\_shtml](http://pbc-clcc.gc.ca/victims/photos/Ontario/kingston_1-eng_shtml) (Accessed June 9, 2015).
8. Correctional Service Canada. Ontario Region. Available at: [http://www.csc-ccc.gc.ca/institutions/001002-3000-eng\\_shtml](http://www.csc-ccc.gc.ca/institutions/001002-3000-eng_shtml) (Accessed June 9, 2015).
9. James WD. The use of technology in providing dermatologic care to vulnerable populations. *Cutis.* 2012;89(2):53-54.
10. Brauner GJ, Goodheart HP. Dermatologic care behind bars. *J Am Acad Dermatol.* 1988; 18:1066-1073.
11. Coates SJ, Kvedar J, Granstein RD. Teledermatology: from historical perspective to emerging techniques of the modern era. Part I: History, rationale, and current practice. *J Am Acad Dermatol.* 2015;72:563-74.

## Abbreviations

CSC: Correctional Service Canada

CBI: Collins Bay Institution

## Other Information

Conflicts of Interest: This study was not funded. JW was contracted by CSC during the study time frame as a consultant dermatologist. GG and AM have no conflicts of interest to declare.

Acknowledgments: The authors would like to thank Dr. Tim Ramsay for assisting with the methodology of this study, and Dr. Jeff Turnbull for reviewing the manuscript.

1  
2  
3  
4  
5  
6  
7  
8  
9  
10  
11  
12  
13  
14  
15  
16  
17  
18  
19  
20  
21  
22  
23  
24  
25  
26  
27  
28  
29  
30  
31  
32  
33  
34  
35  
36  
37  
38  
39  
40  
41  
42  
43  
44  
45  
46  
47  
48  
49  
50  
51  
52  
53  
54  
55  
56  
57  
58  
59  
60

## 246 Tables

247 **Table I - Institutions**

|                                  | <b>Security Level</b> | <b>Approximate Capacity*</b> |
|----------------------------------|-----------------------|------------------------------|
| <b>Kingston Penitentiary</b>     | Maximum               | 500                          |
| <b>Collins Bay Institution</b>   | Medium                | 225                          |
| <b>Bath Institution</b>          | Medium                | 330                          |
| <b>Millhaven Institution</b>     | Maximum               | 430                          |
| <b>Pittsburgh Institution</b>    | Minimum               | 200                          |
| <b>Frontenac Institution</b>     | Minimum               | 150                          |
| <b>Joyceville Institution</b>    | Medium                | 450                          |
| <b>Regional Treatment Centre</b> | Multi-level           | 143                          |
| <b>Warkworth Institution</b>     | Medium                | 537                          |
| <b>TOTAL</b>                     |                       | <b>2965</b>                  |

\*The capacities listed approximate those at the time of consultation. [7,8]

Table II - Dermatologic diagnostic groupings

|                                                                                                                                                                                                                                                                                                                                                                                                                                                                                                                                                                          |                                                                                                                                                                                                                                                                                                                                                   |                                                                                                                                                                                                                                                                                  |
|--------------------------------------------------------------------------------------------------------------------------------------------------------------------------------------------------------------------------------------------------------------------------------------------------------------------------------------------------------------------------------------------------------------------------------------------------------------------------------------------------------------------------------------------------------------------------|---------------------------------------------------------------------------------------------------------------------------------------------------------------------------------------------------------------------------------------------------------------------------------------------------------------------------------------------------|----------------------------------------------------------------------------------------------------------------------------------------------------------------------------------------------------------------------------------------------------------------------------------|
| <b>Acneiform Eruptions:</b>                                                                                                                                                                                                                                                                                                                                                                                                                                                                                                                                              | <b>Disorders of the Mouth:</b>                                                                                                                                                                                                                                                                                                                    | <b>Mechanical Injuries and Wound Care:</b>                                                                                                                                                                                                                                       |
| <ul style="list-style-type: none"> <li>•Acne Vulgaris</li> <li>•Hidradenitis Suppurativa</li> <li>•Perioral Dermatitis</li> <li>•Rosacea</li> </ul>                                                                                                                                                                                                                                                                                                                                                                                                                      | <ul style="list-style-type: none"> <li>•Chelitis</li> <li>•Epulis</li> <li>•Fordyce Spot</li> <li>•Glossodynia</li> <li>•Mucocoele</li> </ul>                                                                                                                                                                                                     | <ul style="list-style-type: none"> <li>•Callus</li> <li>•Excoriation (Compulsive)</li> <li>•Wound and Ulcer</li> </ul>                                                                                                                                                           |
| <b>Benign Neoplasms and Hyperplasias:</b>                                                                                                                                                                                                                                                                                                                                                                                                                                                                                                                                | <b>Hair Disorders:</b>                                                                                                                                                                                                                                                                                                                            | <b>Miscellaneous Inflammatory Disorders:</b>                                                                                                                                                                                                                                     |
| <ul style="list-style-type: none"> <li>•Acrochordon</li> <li>•Angiofibroma: Pearly Penile Papule</li> <li>•Angiokeratoma</li> <li>•Angiolipoma</li> <li>•Becker's Nevus</li> <li>•Benign Melanocytic Nevus</li> <li>•Cherry Hemangioma</li> <li>•Cyst (Epidermal)</li> <li>•Cyst (Pilar)</li> <li>•Cyst (Sclerosed)</li> <li>•Dermatofibroma</li> <li>•Dermatosis Papulosa Nigra</li> <li>•Keloid</li> <li>•Lipoma</li> <li>•Pyogenic Granuloma</li> <li>•Scar</li> <li>•Sebaceous Hyperplasia</li> <li>•Seborrheic Keratosis</li> <li>•Vascular Malformation</li> </ul> | <ul style="list-style-type: none"> <li>•Cicatricial Alopecia</li> <li>•Folliculitis</li> <li>•Folliculitis Decalvans</li> <li>•Keloid (Acne Keloidalis Nuchae)</li> <li>•Keratosis Pilaris</li> <li>•Non-cicatricial Alopecia</li> <li>•Perifollicular Inflammation</li> <li>•Pseudofolliculitis</li> <li>•Pseudofolliculitis (Barbae)</li> </ul> | <ul style="list-style-type: none"> <li>•Granuloma Annulare</li> <li>•Lichen Planus</li> <li>•Lichen Nitidus</li> <li>•Lichen Sclerosus</li> <li>•Pityriasis Rosea</li> </ul>                                                                                                     |
|                                                                                                                                                                                                                                                                                                                                                                                                                                                                                                                                                                          | <b>Ichthyosis:</b>                                                                                                                                                                                                                                                                                                                                | <b>Nail Disorders:</b>                                                                                                                                                                                                                                                           |
|                                                                                                                                                                                                                                                                                                                                                                                                                                                                                                                                                                          | •Ichthyosis Vulgaris                                                                                                                                                                                                                                                                                                                              | •Nail Loss                                                                                                                                                                                                                                                                       |
|                                                                                                                                                                                                                                                                                                                                                                                                                                                                                                                                                                          | <b>Infections:</b>                                                                                                                                                                                                                                                                                                                                | <b>Pigmentary Disorders:</b>                                                                                                                                                                                                                                                     |
|                                                                                                                                                                                                                                                                                                                                                                                                                                                                                                                                                                          | <ul style="list-style-type: none"> <li>•Abscess</li> <li>•Bacterial (Secondary)</li> <li>•Dermatophyte</li> <li>•Human Papilloma Virus</li> <li>•Scabies</li> <li>•Tinea Versicolour</li> <li>•Viral</li> <li>•Yeast</li> </ul>                                                                                                                   | <ul style="list-style-type: none"> <li>•Confluent and Reticulated Papillomatosis</li> <li>•Dermatoheliosis</li> <li>•Melasma</li> <li>•Post-Inflammatory Hyperpigmentation</li> <li>•Vitiligo</li> </ul>                                                                         |
| <b>Dermatitis:</b>                                                                                                                                                                                                                                                                                                                                                                                                                                                                                                                                                       | <b>Internal Diseases (Autoimmune, Endocrine, Genetic, Metabolic, Rheumatologic):</b>                                                                                                                                                                                                                                                              | <b>Precancerous Lesions and Cutaneous Carcinomas:</b>                                                                                                                                                                                                                            |
| <ul style="list-style-type: none"> <li>•Atopic Dermatitis</li> <li>•Contact Dermatitis</li> <li>•Dermatitis</li> <li>•Dyshidrotic Dermatitis</li> <li>•Hand Dermatitis</li> <li>•Lichen Simplex Chronicus</li> <li>•Neurodermatitis</li> <li>•Nummular Dermatitis</li> <li>•Prurigo Nodularis</li> <li>•Seborrheic Dermatitis</li> <li>•Stasis Dermatitis</li> </ul>                                                                                                                                                                                                     | <ul style="list-style-type: none"> <li>•Acanthosis Nigricans</li> <li>•Dermatitis Herpetiformis</li> <li>•Hypertension (Venous or Lymphatic)</li> <li>•Neurofibromatosis Type 1</li> <li>•Sarcoidosis</li> <li>•Ulcerative Colitis associated Pustular Eruption</li> <li>•Vasculitis (Small Vessel)</li> <li>•Xanthelasma</li> </ul>              | <ul style="list-style-type: none"> <li>•Actinic Keratosis</li> <li>•Basal Cell Carcinoma</li> <li>•Dysplastic Nevus</li> <li>•Malignant Melanoma</li> <li>•Squamous Cell Carcinoma</li> </ul>                                                                                    |
|                                                                                                                                                                                                                                                                                                                                                                                                                                                                                                                                                                          |                                                                                                                                                                                                                                                                                                                                                   | <b>Psoriasis:</b>                                                                                                                                                                                                                                                                |
|                                                                                                                                                                                                                                                                                                                                                                                                                                                                                                                                                                          |                                                                                                                                                                                                                                                                                                                                                   | •Psoriasis                                                                                                                                                                                                                                                                       |
|                                                                                                                                                                                                                                                                                                                                                                                                                                                                                                                                                                          |                                                                                                                                                                                                                                                                                                                                                   | <b>Urticaria:</b>                                                                                                                                                                                                                                                                |
|                                                                                                                                                                                                                                                                                                                                                                                                                                                                                                                                                                          |                                                                                                                                                                                                                                                                                                                                                   | <ul style="list-style-type: none"> <li>•Dermographism</li> <li>•Urticaria (Cholinergic)</li> <li>•Urticaria (Cold)</li> <li>•Urticaria (Drug)</li> <li>•Urticaria (Idiopathic)</li> <li>•Urticaria (Pressure)</li> <li>•Urticaria (Solar)</li> <li>•Urticaria (Viral)</li> </ul> |

255 **Table III - Demographic data**

|                                                                                | Demographic data          |
|--------------------------------------------------------------------------------|---------------------------|
| <b>Total Number of Patients</b>                                                | 320                       |
| •Patients seen only in in-person encounters                                    | 258                       |
| •Patients seen only in teledermatology                                         | 60                        |
| •Patients seen in both in-person and teledermatology (for different diagnoses) | 2                         |
| <b>Age:</b>                                                                    |                           |
| •Average Age                                                                   | 38. 8 years (Range 20-89) |
| •Median                                                                        | 36 years                  |
| •Mode                                                                          | 30 years                  |
| <b>Skin Phototype:</b>                                                         |                           |
| •1-3                                                                           | 150                       |
| •4-6                                                                           | 97                        |
| •Not Recorded                                                                  | 73                        |
| <b>Institutions:</b>                                                           |                           |
| •Kingston Penitentiary                                                         | 17                        |
| •Collins Bay Institution                                                       | 117 (all in-person)       |
| •Bath Institution                                                              | 34                        |
| •Millhaven Institution                                                         | 30                        |
| •Pittsburgh Institution                                                        | 15                        |
| •Frontenac Institution                                                         | 33                        |
| •Joyceville Institution                                                        | 27                        |
| •Regional Treatment Centre                                                     | 2                         |
| •Warkworth Institution                                                         | 40                        |
| •Not Recorded                                                                  | 5                         |
| <b>Number of Encounters per Patient (Average)</b>                              | 1. 5 (Range: 1-16)        |
| <b>Number of Diagnoses per Patient (Average)</b>                               | 1. 5 (Range 0-6)          |

256

257 **Table IV - Frequency of grouped dermatologic diagnoses**

| Grouped Dermatologic Diagnoses                       | Number of Cases |                 |
|------------------------------------------------------|-----------------|-----------------|
|                                                      | In-Person       | Teledermatology |
| <b>Acneiform Eruptions</b>                           | 68              | 17              |
| <b>Benign Neoplasms and Hyperplasias</b>             | 52              | 7               |
| <b>Dermatitis</b>                                    | 73              | 15              |
| <b>Disorders of the Mouth</b>                        | 6               | 2               |
| <b>Hair Disorders</b>                                | 29              | 6               |
| <b>Ichthyosis</b>                                    | 3               | 1               |
| <b>Infections</b>                                    | 48              | 8               |
| <b>Internal Diseases</b>                             | 12              | 2               |
| <b>Mechanical Injuries and Wound Care</b>            | 13              | 0               |
| <b>Miscellaneous Inflammatory Disorders</b>          | 15              | 5               |
| <b>Nail Disorders</b>                                | 2               | 3               |
| <b>Pigmentary Disorders</b>                          | 8               | 5               |
| <b>Precancerous Lesions and Cutaneous Carcinomas</b> | 19              | 7               |
| <b>Psoriasis</b>                                     | 45              | 6               |
| <b>Urticaria</b>                                     | 8               | 1               |



| Grouped Dermatologic Diagnoses | Number of Cases |                 |
|--------------------------------|-----------------|-----------------|
|                                | In-Person       | Teledermatology |
| <b>Total</b>                   | <b>401</b>      | <b>85</b>       |

**Table V - Most common specific dermatologic diagnoses**

| Rank | In-Person                                    |                 | Teledermatology                                                                            |                 |
|------|----------------------------------------------|-----------------|--------------------------------------------------------------------------------------------|-----------------|
|      | Specific Diagnoses                           | Number of Cases | Specific Diagnoses                                                                         | Number of Cases |
| 1    | Acne Vulgaris                                | 61              | Acne Vulgaris                                                                              | 12              |
| 2    | Psoriasis                                    | 45              | Psoriasis                                                                                  | 6               |
| 3    | Seborrheic Dermatitis                        | 19              | Dermatophyte                                                                               | 5               |
| 4    | Pityriasis Versicolour<br>Contact Dermatitis | 17              | Atopic Dermatitis<br>Lichen Planus                                                         | 4               |
| 5    | Human Papilloma Virus                        | 16              | Actinic keratosis<br>Basal cell carcinoma<br>Nail loss<br>Rosacea<br>Seborrheic dermatitis | 3               |

## Permission for Acknowledgement Form

Authors should specify, in the acknowledgements section, contributions to the paper that should be recognized but do not justify authorship, for example critical review of the study proposal or assistance with statistical analysis. The *Canadian Medical Association Journal (CMAJ)* requires that these people give their written permission for their names to appear in print.

File no.:

Title: Patterns of Skin Disease in a Canadian Prison Population: a Retrospective Study

Author(s): Geneviève Gavigan, Alana McEvoy, James Walker

I, the undersigned, agree to be identified in the acknowledgements section of the above-named manuscript for my contribution to its preparation.

Nov 13, 2015/ Tim Ramsay  
Date Print name

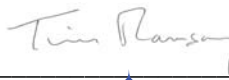  
Signature

**Please complete all required fields (file number, title and author(s)) before returning to:**

***The Canadian Medical Association Journal*, by fax: 613 565-5471, by email: PUBL@cmaj.ca, or by mail c/o Canadian Medical Association, CMAJ, 1867 Alta Vista Dr., Ottawa ON K1G 5W8**

**Permission for Acknowledgement Form**

Authors should specify, in the acknowledgements section, contributions to the paper that should be recognized but do not justify authorship, for example critical review of the study proposal or assistance with statistical analysis. The *Canadian Medical Association Journal (CMAJ)* requires that these people give their written permission for their names to appear in print.

File no.:

Title: Patterns of Skin Disease in a Canadian Prison Population: a Retrospective Study

Author(s): Geneviève Gavigan, Alana McEvoy, James Walker

I, the undersigned, agree to be identified in the acknowledgements section of the above-named manuscript for my contribution to its preparation.

2015/11/19 / \_\_\_\_\_ Jeffrey Turnbull  
 Date Print name  
 \_\_\_\_\_  
 Signature

**Please complete all required fields (file number, title and author(s)) before returning to:**

*The Canadian Medical Association Journal*, by fax: 613 565-5471, by email: PUBS@cmaj.ca, or by mail c/o Canadian Medical Association, CMAJ, 1867 Alta Vista Dr., Ottawa ON K1G 5W8
